# Supplementary material
Source: Research Square preprint supplement (doi:10.21203/rs.3.rs-9371435/v1)
Supplement: Supplementary file 1 [file 31ed52c474d35ea88507f45a.docx]

**AFRICA MEDICAL COLLEGE**

**Department of Pharmacy**

Questionnaires for the assessment of knowledge, attitude and practice of ADR reporting among community pharmacies in Kolfe Keraniyo.

**Consent form**

We are conducting a study to assess the knowledge, attitude, and practice of Adverse Drug Reaction (ADR) reporting among community pharmacies in Kolfe Keraniyo. You are kindly invited to participate in this assessment. Completing the questionnaire will take approximately 10 minutes. Your participation in this study will not expose you to any physiological, psychological, or financial harm. All information you provide will be kept strictly confidential and will not be disclosed to any individual or institution. No personal identifiers will be collected or used in any reports resulting from this study. Your participation is entirely voluntary. You have the full right to decline participation or withdraw from the study at any time, either partially or completely, without any consequences.

If you agree to participate, please proceed to complete the questionnaire.

If you do not wish to participate, we sincerely thank you for your time and consideration.

**ANNEX: QUESTIONNAIRE**

1. **Socio-demographic Characteristics**

| **S/N** | **Variables** | **Values** |
| --- | --- | --- |
| 1 | Type of the community pharmacy | 1. Private 2. Public |
| 2 | Sex | 1. Male 2. female |
| 3 | Age | - (in years) |
| 4 | Professions | 1. Pharmacist 2. Druggist 3. Pharmacy technician 4. Other specify------------ |
| 5 | Highest level of Education | 1. Diploma 2. Bachelor 3. Other(mention)---------- |
| 6 | Year of experience in drug dispensing | <1yr  1-5  6-10  >10 |
| 7 | How many minutes do you take to attend to a  Patient ? | <5  5-10  11-15  >15 |
| 8 | What is the average number of patients that you  Encounter per day? | <10  10-30  31-60  61-90  >90 |
| 9 | How many working hours per day do you spend in a  Pharmacy? | < 8  ≥ 8 |
| 10 | Have you been introduced to ADR monitoring or pharmacovigilance in your undergraduate study? | Yes No |
| 11 | Have you ever participated in any seminar/training which includes a topic on ADRs reporting? | Yes No |

1. **Knowledge on ADRs Reporting**

| **S/N** | **Variables** | **Value** |
| --- | --- | --- |
| 1 | Do you think that an adverse drug reaction is the  Same as a side effect? | 1.Yes,2. No |
| 2 | Do you know the term pharmacovigilance? | 1.Yes,2. No |
| 3 | Do you know the existence of a national ADR  Reporting system? | 1.Yes,2. No |
| 4 | Do you know the ADR reporting form? | 1.Yes,2. No |
| 5 | Do you think that ADRs are well documented at  the time a drug is marketed? | 1.Yes,2. No |
| 6 | Where are the reports for ADRs supposed to be sent? | 1. MOH 2.EFDA 5.EPA  3. PFSA 4.kolfe-FDA 6. other… |
| 7 | Which profession is required to report suspected cases of ADRs? | 1. Doctors 2. Pharmacy profession 3. Nurses 4. Traditional medicine practitioners 5. Others mention----------- |
| 8 | What reactions should be reported? | 1. Those due to conventional medicines 2. Those due to vaccines and blood products, 3. Those due to herbal medicines including traditional medicines 4. Those due to cosmetics 5. Those due to medical devices |
| 9 | Who do you think is primarily responsible to remind and follow up with patients about the side effects of drugs they are given? | 1. Pharmacy professionals 2. Physicians 3. Nurses 4. Other, specify-------------- |
| 10 | Who do you think is responsible for monitoring ADR in Ethiopia? | 1. MOH 2. EFDA 3. EPA 4. Other, specify----------------- |

| **S/N** | **Statement** | **Strongly agree** | **Agree** | **Neither agree or**  **disagree** | **Disagree** | **Strongly disagree** |
| --- | --- | --- | --- | --- | --- | --- |
| 1 | ADR should be reported regularly |  |  |  |  |  |
| 2 | ADR reporting is part of the duty of health professionals |  |  |  |  |  |
| 3 | Reporting drug safety is important for the public |  |  |  |  |  |
| 4 | Reporting drug safety is important  For the patient |  |  |  |  |  |
| 5 | Reporting drug safety is important  For the health care system |  |  |  |  |  |

| 6 | There is a need to be sure that an ADR is related to the drug before  reporting |  |  |  |  |  |
| --- | --- | --- | --- | --- | --- | --- |
| 7 | Only ADRs of prescription drugs  Need to be reported |  |  |  |  |  |
| 8 | Only ADRs that cause persistent disability or incapacity should be  Reported |  |  |  |  |  |
| 9 | Reporting of ADR should be  Voluntary |  |  |  |  |  |
| 10 | Community pharmacists can contribute to the detection and  Reporting of ADRs |  |  |  |  |  |

1. **Reasons for Not Reporting ADR**

| **S/N** | **Variables** | **Strongly**  **agree** | **Agree** | **Neither agree**  **Nor disagree** | **Disagree** | **Strongly**  **disagree** |
| --- | --- | --- | --- | --- | --- | --- |
| 11 | Need to be certain of the association  Between the drug and ADR |  |  |  |  |  |
| 12 | Reporting ADR is a breach of patient  Confidentiality |  |  |  |  |  |
| 13 | One report makes no difference |  |  |  |  |  |
| 14 | The reporting form is not available  Adequately |  |  |  |  |  |
| 15 | There is no national ADR reporting  System |  |  |  |  |  |
| 16 | Reporting is not useful to the patient |  |  |  |  |  |
| 17 | Reporting creates an additional  workload |  |  |  |  |  |
| 18 | Lack of motivation for reporting |  |  |  |  |  |

1. **Practices on ADRs Reporting**

| **S/N** | **Variables** | **Values** |
| --- | --- | --- |
| 1 | Have you ever encountered patients with ADRs in your pharmacy practice, in the last 12 months? | 1. Yes 2. No |
| 2 | How many patients with ADR did you see during the last 12 months? | 1. One 2. Two 3. Three 4. Four 5. Greater than four |
| 3 |  | 1. Yes |

|  | Have you ever reported adverse drug reactions? | 2. No |
| --- | --- | --- |
| 4 | To whom did you report? | 1. The head of the pharmacy 2. Manufacturers 3. FDA 4. MOH 5. Others, specify------- |
| 5 | How often do you advise your patients on possible adverse effects of drugs you dispensed? | 1. Usually 2. Sometimes 3. Rarely 4. Never |

**THANK YOU VERY MUCH FOR YOUR PARTICIPATION!**
